# Supplementary material for: High thermal stability and high tensile strength terpolyester nanofibers containing biobased monomer: fabrication and characterization
Source: Royal Society of Chemistry journal article supplement (doi:10.1039/c6ra02852g), 2016-01-01
Supplement: c6ra02852g1.pdf [file c6ra02852g1.pdf]

## Electronic Supplementary Information

# High Thermal Stability and High-Tensile Strength Terpolyester Nanofiber Containing Biobased Monomer: Fabrication and Characterization

Hoik Lee,<sup>a</sup> Jun Mo Koo,<sup>b</sup> Daewon Sohn,<sup>c</sup> Ick-Soo Kim<sup>a\*</sup> and Seung Soon Im<sup>b\*\*</sup>

The correlation of diameter and shear viscosity with concentration.

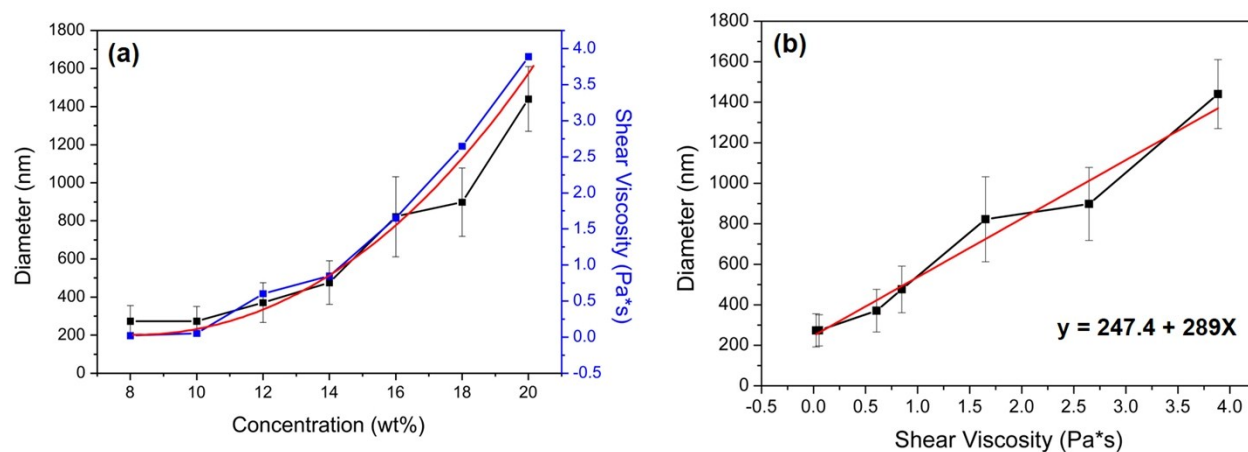

Figure S1. (a) Effect of the concentration of PEICT solution on the diameter and shear viscosity; (b) relationship between the shear viscosity and diameter. Both diameter and shear viscosity was fitted with a power law of PEICT concentration.

### IR spectrum of PCT polymer

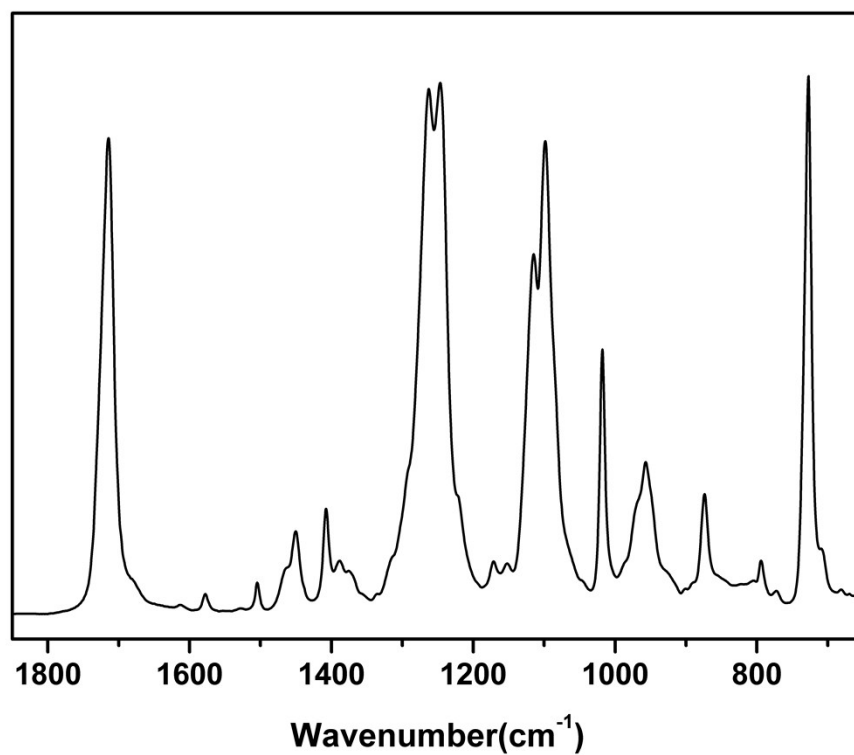

Figure S2. IR spectrum of PCT polymer. It shows both peak of 1240 and 1260 cm<sup>-1</sup> same as PEICT nanofiber.
